# Supplementary material for: Droughts and media: when and how do the newspapers talk about the droughts in England?
Source: Copernicus journal article supplement (doi:10.5194/hess-29-3795-2025), 2025-08-15
Supplement: Supplementary file 1 [file hess-29-3795-2025-supplement.zip]

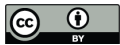

## *Supplement of*

# **Droughts and media: when and how do the newspapers talk about the droughts in England?**

**Inhye Kong et al.**

*Correspondence to:* Inhye Kong ([inhye.kong@geo.uzh.ch](mailto:inhye.kong@geo.uzh.ch))

- [hess-29-3795-2025-supplement-title-page.pdf](#)
- [Supplementary Material 1.html](#)
- [Supplementary Material 2.docx](#)

The copyright of individual parts of the supplement might differ from the article licence.
